# Supplementary material
Source: PubMed Central journal article supplement (PMC3022000)

**A**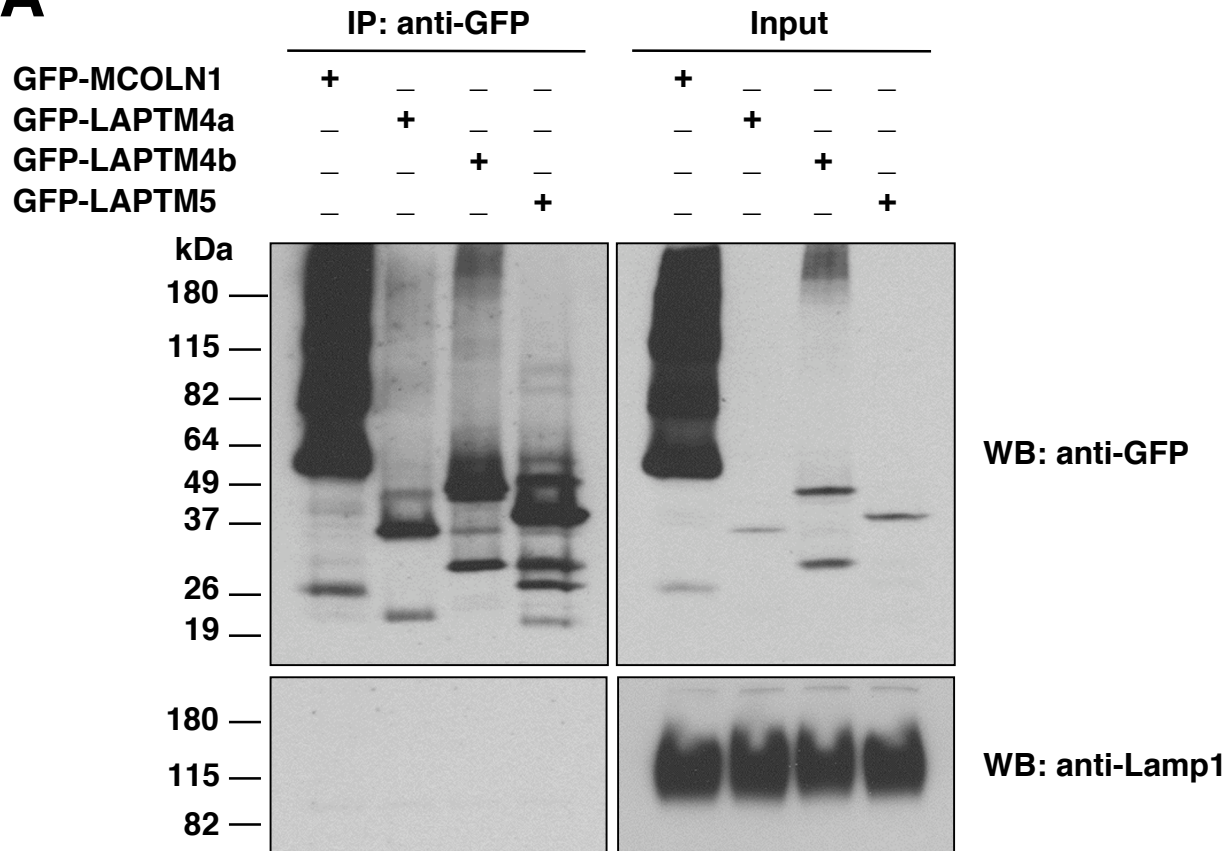**B**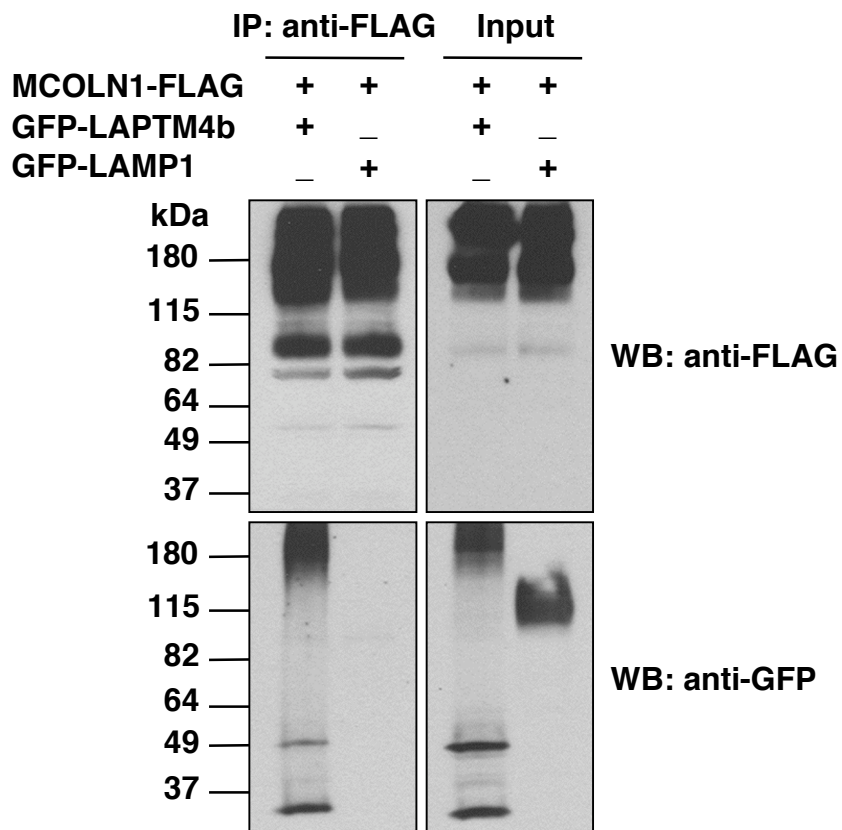

Supplement: supp_124_3_459__1.pdf [file supp_124_3_459__1.pdf]

**A**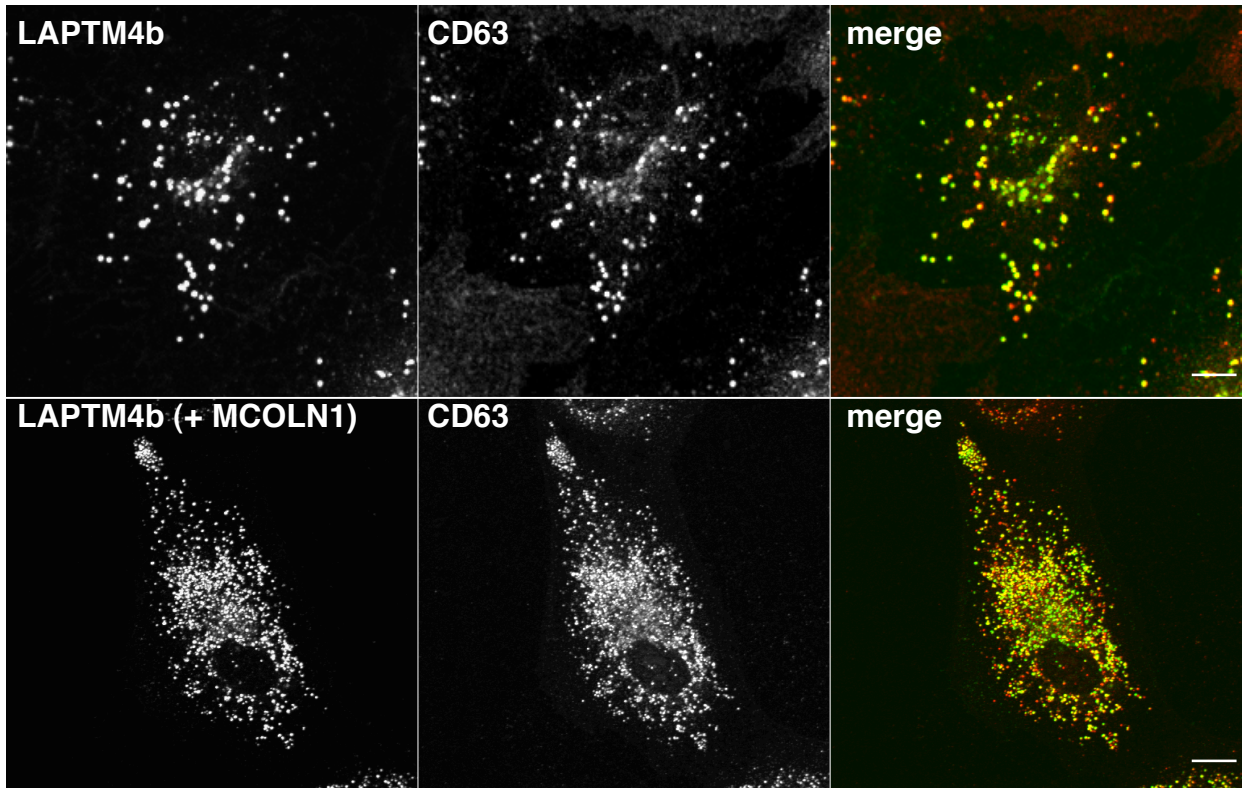**B**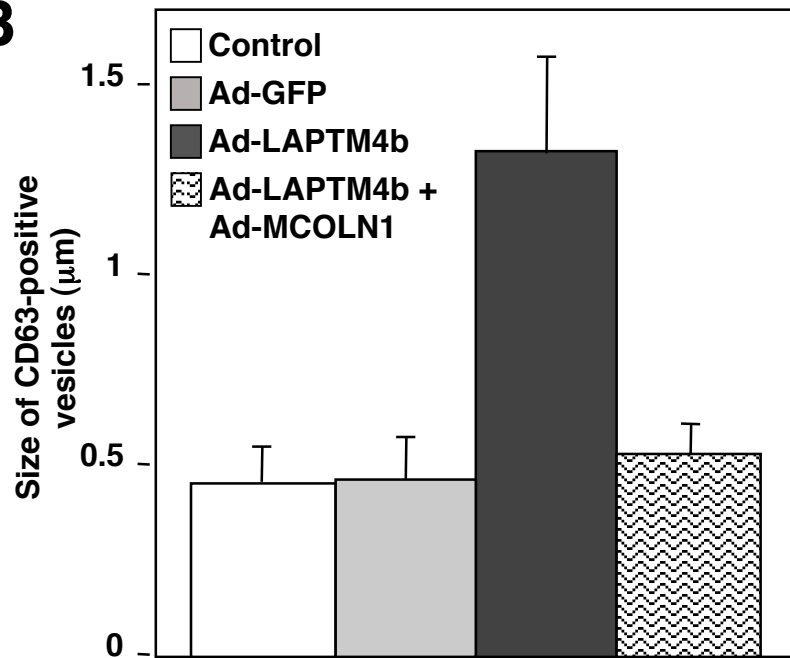

Supplement: supp_124_3_459__2.pdf [file supp_124_3_459__2.pdf]

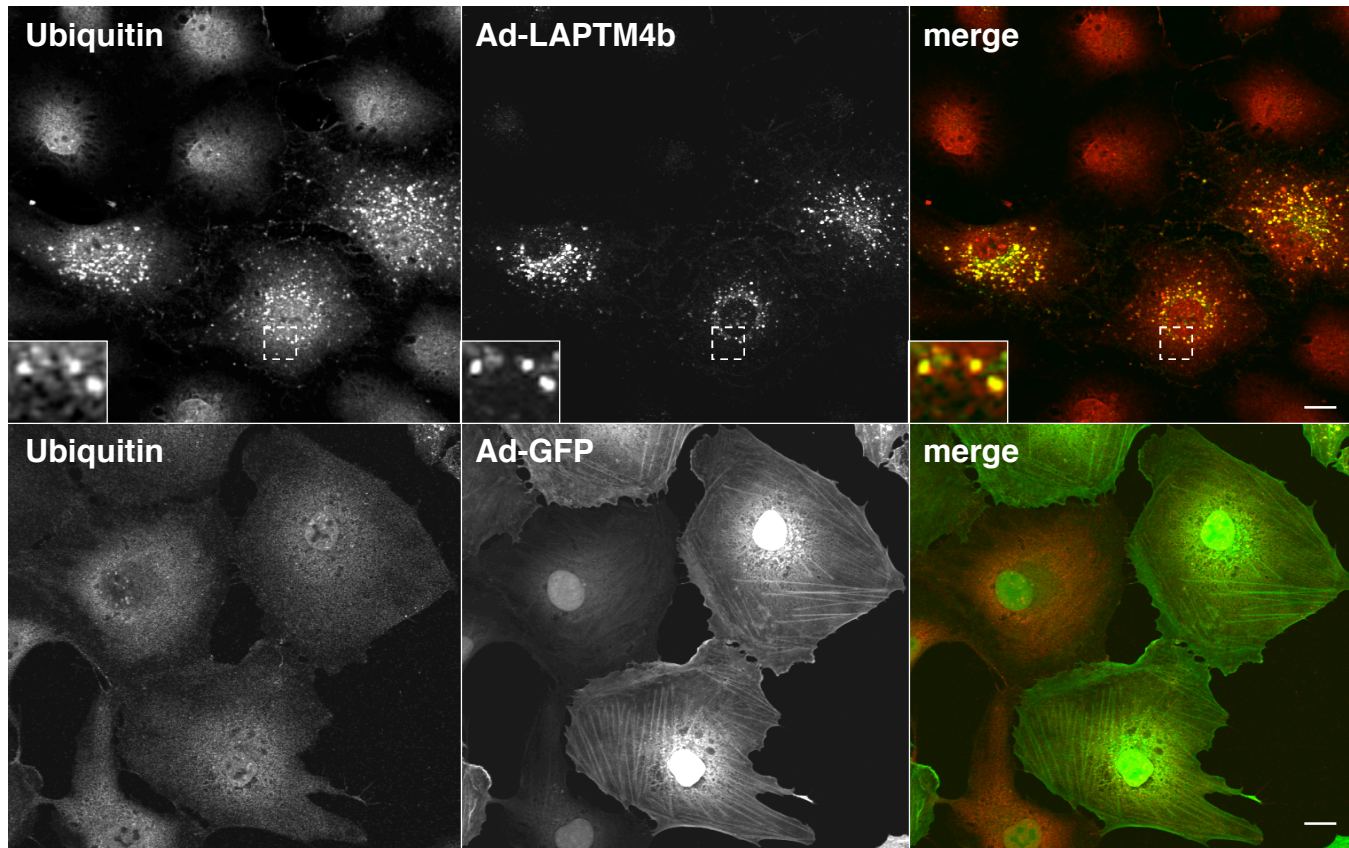

Supplement: supp_124_3_459__3.pdf [file supp_124_3_459__3.pdf]

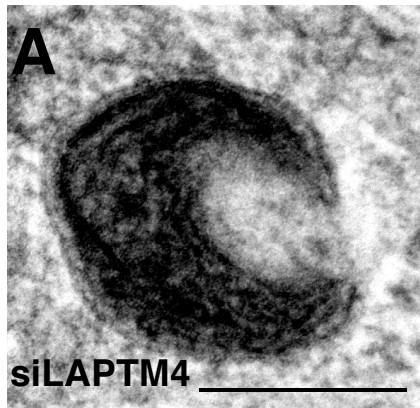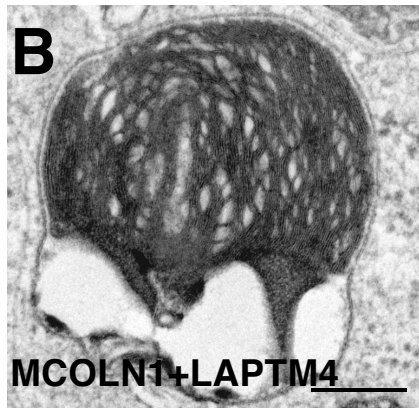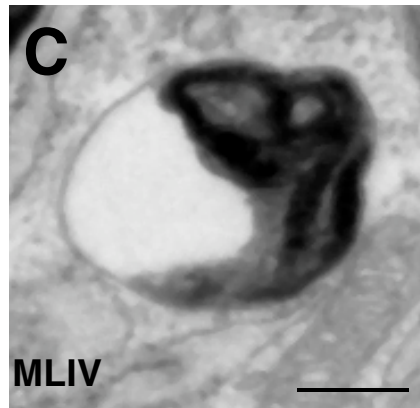

Supplement: supp_124_3_459__4.pdf [file supp_124_3_459__4.pdf]
